# Supplementary material for: Developmental origins for semilunar valve stenosis identified in mice harboring congenital heart disease-associated GATA4 mutation
Source: PubMed Central journal article supplement (PMC6602309; doi:10.1242/dmm.036764), 2019-06-24
Supplement: dmm-12-036764-s1.pdf [file dmm-12-036764-s1.pdf]

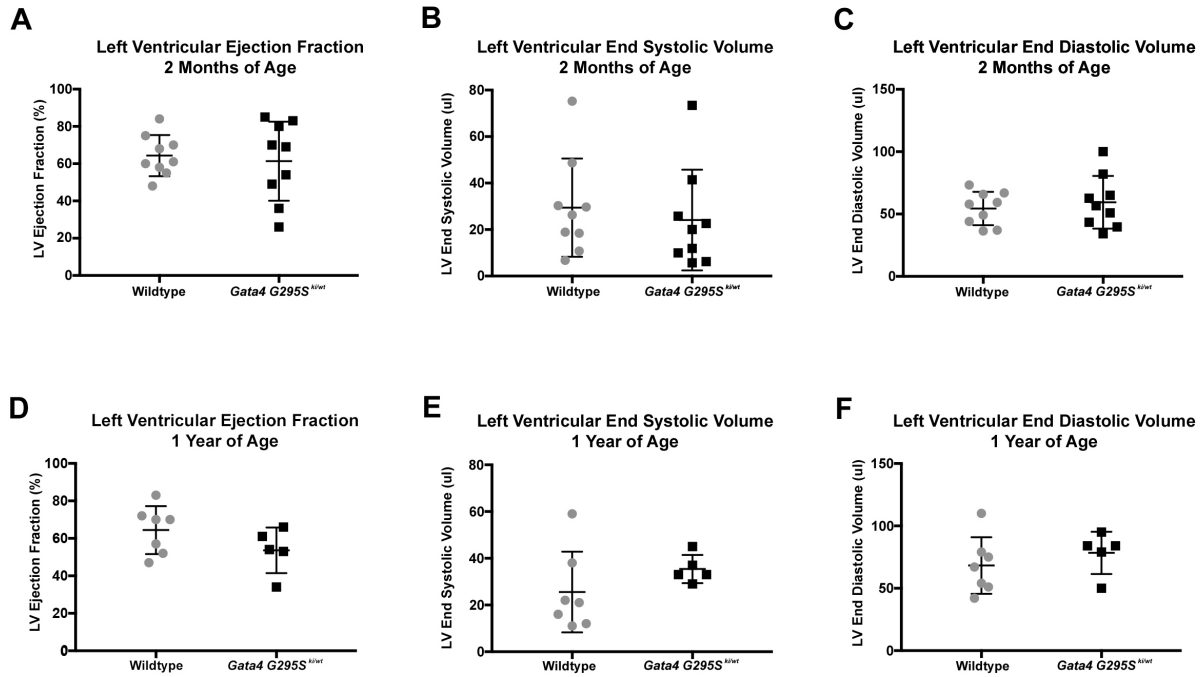

**Figure S1. Echocardiographic analysis of left ventricular function at one year and two months of age.** Left ventricular function of *Gata4* G295S<sup>ki/wt</sup> and wildtype littermate controls at 2 months (A-C) and one year (D-F) of age was not found to be significantly different. A) and D) represent left ventricular ejection fraction, B) and E) represent left ventricular end systolic volume, and C) and F) represent left ventricular end diastolic volume.

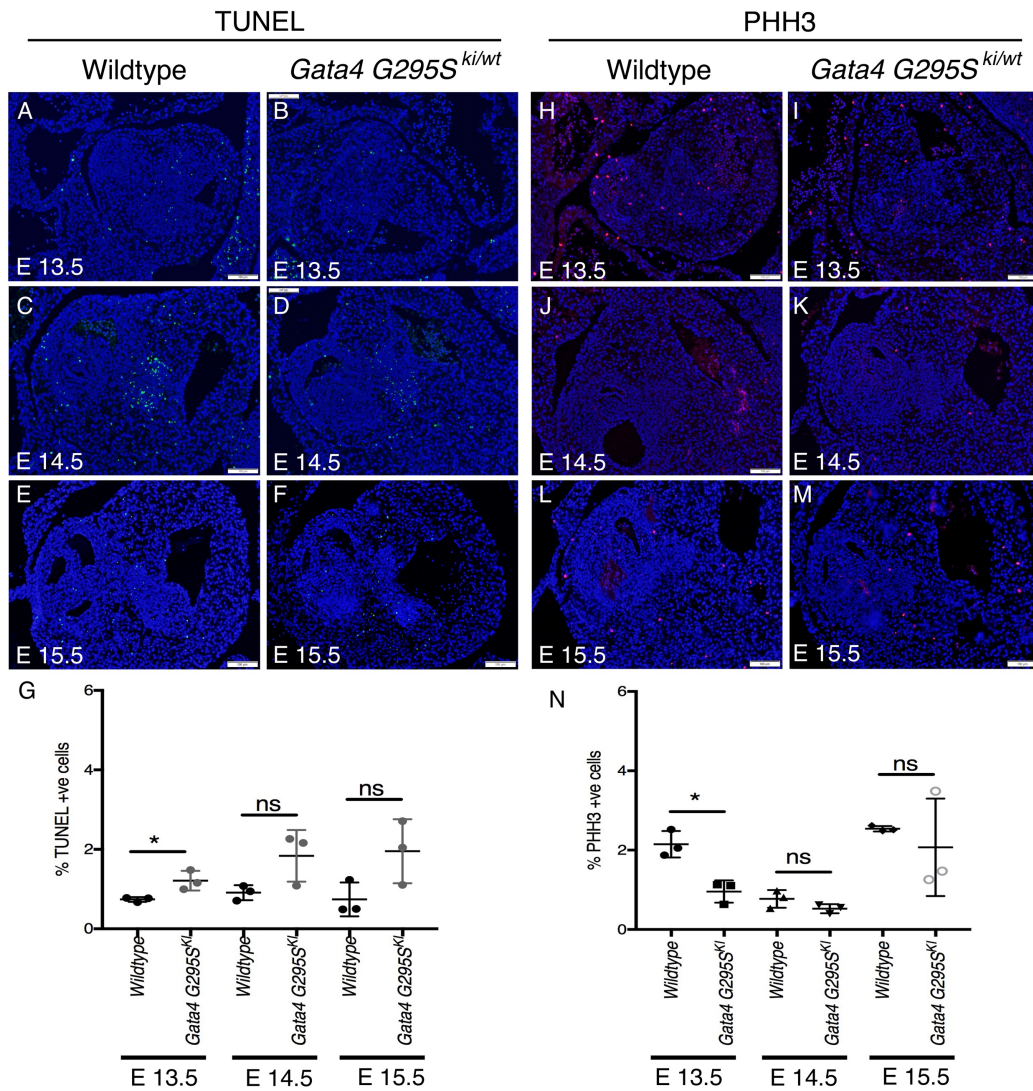

**Figure S2. Quantification of cardiac apoptosis and proliferation in cardiac outflow tract cushions in *Gata4*<sup>G295Ski/wt</sup> and wildtype littermates.** Representative images of TUNEL (A-F) and phosphohistone H3 (PHH3) staining is shown from E13.5, E14.5, and E15.5. Quantification of TUNEL and PHH3 staining is shown as a percentage of positive stained cells in valve area in G and H, respectively. Wildtype n=3, *Gata4*<sup>G295Ski/wt</sup> n=3 for each timepoint; \*, p value < 0.05; ns, p value > 0.05.

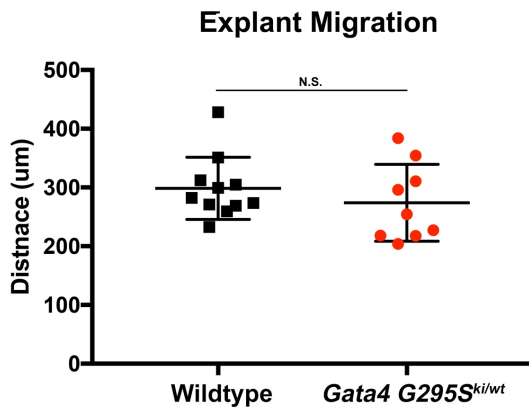

**Figure S3. Quantification of migration in OFT explant assay shows no significant differences between *Gata4* *G295S<sup>ki/wt</sup>* and wildtype OFTs.** Averages of 3 measurements of distance per explant were assessed. Black boxes represent wildtype measurements and red circles are *Gata4<sup>G295Ski/wt</sup>* measurements. N.S. = p value > 0.05.

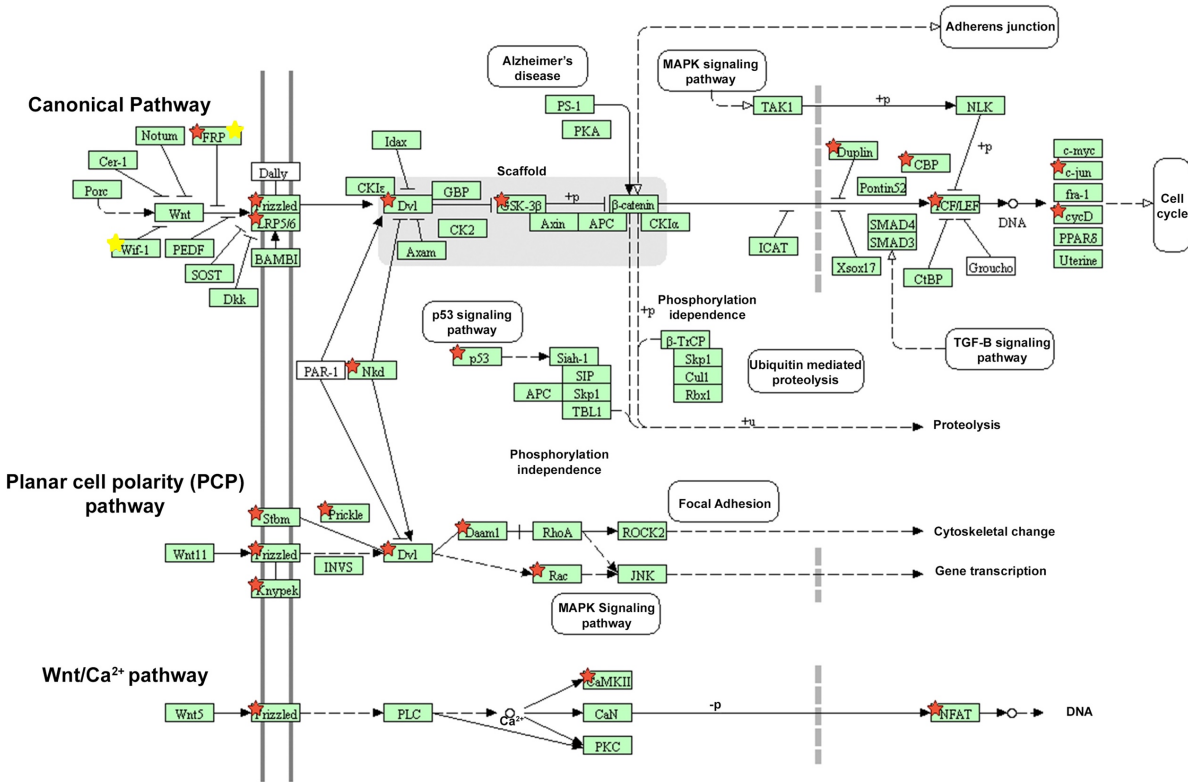

**Figure S4. Dysregulation of Wnt signaling in *Gata4*<sup>G295Ski/wt</sup> outflow tracts by RNA-seq.** The Wnt signaling KEGG pathway exhibits multiple components differentially expressed in the *Gata4*<sup>G295Ski/wt</sup> OFTs compared to wildtype littermate control. Red (downregulated) and yellow (upregulated) asterisks indicate differentially expressed gene. KEGG Copyright permission obtained from Kanehisa and Goto, 2000.

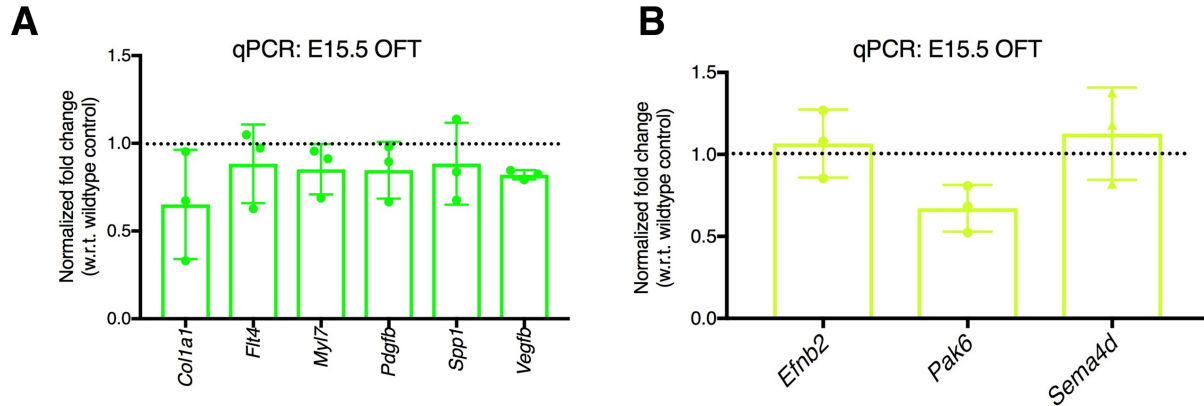

**Figure S5. Validation of gene expression changes in axonal guidance and focal adhesion pathways by RT-qPCR.** (A) Transcript levels of representative dysregulated genes in the focal adhesion pathway by RT-qPCR measured in E15.5 *Gata4*<sup>G295Ski/wt</sup> OFTs by RT-qPCR when compared to wildtype littermate OFTs (n=3). (B) Transcript levels of dysregulated genes in axon guidance pathway by RT-qPCR measured in E15.5 *Gata4*<sup>G295Ski/wt</sup> OFTs by RT-qPCR when compared to wildtype littermate OFTs (n=3). All genes were normalized with respect to (w.r.t) internal *gapdh* control and dotted line represent wild type expression.



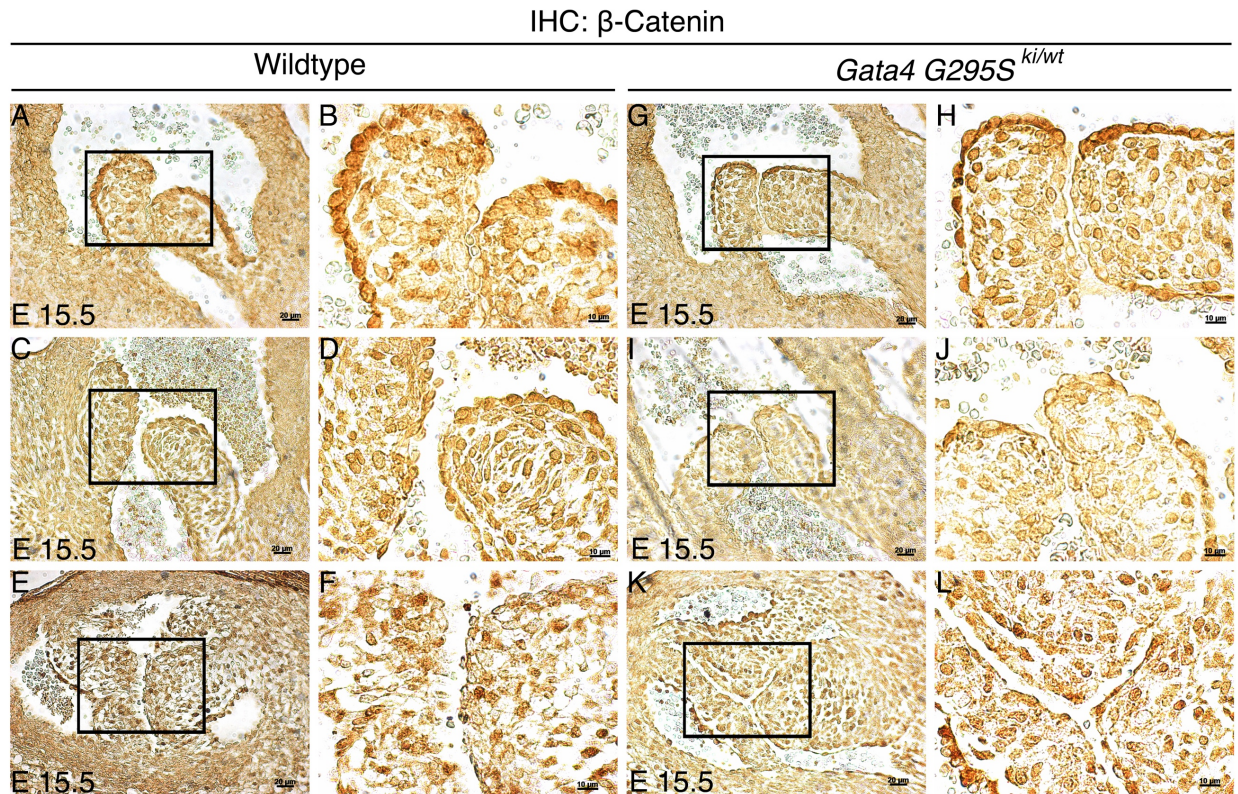

**Figure S6. Decreased expression of beta-catenin in E15.5 *Gata4*<sup>G295Ski/wt</sup> aortic valve leaflets.** Immunohistochemistry for  $\beta$ -catenin protein in E15.5 aortic valve leaflets from *Gata4*<sup>G295Ski/wt</sup> (G-L) and wildtype (A-F) littermates shows an overall decrease in  $\beta$ -catenin expression in mutants, which is more predominant in the interstitial cells but is also seen in the endothelial lining of the developing leaflets. Representative images from three mutant and three wildtype littermate embryos are shown. Blackboxes indicate the high magnification area presented right to each image. Scale bar represents 20  $\mu$ m in A, C, E, G, I, K and 10  $\mu$ m in B, D, F, H, J, L.

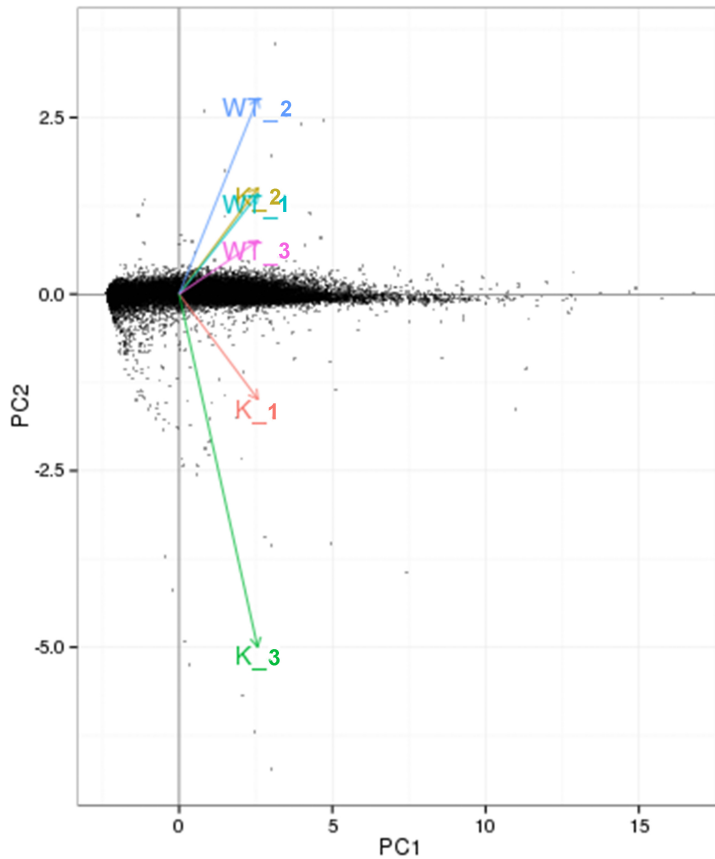

**Figure S7. Principal Component Analysis of RNA-seq samples.** Utilization of 2 principle components (PCs) to assess overall differences between RNA-seq samples. Knock-in 2 (yellow) grouped with the wildtype samples (teal, blue, pink), not with the other knock-in samples (red, green), and was removed from the subsequent analysis.

#### Reference

Kanehisa, M. and Goto, S. (2000). KEGG: kyoto encyclopedia of genes and genomes. *Nucleic Acids Res* **28**, 27-30.

| Sample                         | KI Read Depth | WT Read Depth | Variant Frequency |
|--------------------------------|---------------|---------------|-------------------|
| Gata4 G295S <sup>ki/wt</sup> 1 | 14            | 25            | 36.00%            |
| Gata4 G295S <sup>ki/w</sup> 3  | 9             | 12            | 43.00%            |
| Wildtype 1                     | 0             | 44            | 0.00%             |
| Wildtype 2                     | 0             | 44            | 0.00%             |
| Wildtype 3                     | 0             | 28            | 0.00%             |

**Table S1.** *Gata4* G295S allele frequency in RNA-seq datasets. KI: number of sequencing reads that covered the G295S mutation, WT: number of sequencing reads that read the G295 location as wildtype.



**Table S2**

| Gene Symbol   | Primer Name | Primer sequence       |
|---------------|-------------|-----------------------|
| <i>Ccnd2</i>  | CCND2_L     | GCCAAGATCACCCACACTGA  |
|               | CCND2_R     | GCGTTATGCTGCTCTTGACG  |
| <i>Crebbp</i> | CREBBP_L    | GCAGGAGGCATGACCAAGAT  |
|               | CREBBP_R    | ATCTGCTGCCCTCCAGTTTG  |
| <i>Daam2</i>  | DAAM_L      | TGGCCCCACTGGAAACTTT   |
|               | DAAM_R      | CCGAAACTTCTCTGCCTGGT  |
| <i>Dvl3</i>   | DVL_L       | CGGCCATCGTAAAAGCCATG  |
|               | DVL_R       | CCGAGCCGATGAAAGCATTG  |
| <i>Fzd2</i>   | FZD2_L      | TCCTCACATGGTCCGGTGTTG |
|               | FZD2_R      | TGTAGCAGCCGGACAGAAAG  |
| <i>Fzd10</i>  | FZD10_L     | TGGGCAGCATGGATGTCAAT  |
|               | FZD10_R     | AAAGCCGGACAGGATGAAGG  |
| <i>Gsk3b</i>  | GSK3B_L     | ACCGAGAACCACCTCCTTTG  |
|               | GSK3B_R     | TGTGGTTACCTTGCTGCCAT  |
| <i>Lrp5</i>   | LRP5_L      | AAGACAGGGGCTGAGGAAGT  |
|               | LRP5_R      | TGAAGTCAGGGGTGTCCAGA  |
| <i>Nfatc1</i> | NFATC1_L    | GGTGCTGTCTGGCCATAACT  |
|               | NFATC1_R    | TCCCGGTCAGTCTTTGCTTC  |
| <i>Nfatc2</i> | NFATC2_L    | TCGTAGGCAACACCAAGGTC  |
|               | NFATC2_R    | TGTTCTTCCTGCCGATGTCC  |
| <i>Rac3</i>   | RAC3_L      | GAAGCTGGCACCCATAACCT  |
|               | RAC3_R      | AGAGCTGAGCACTCCAGGTA  |
| <i>Sfrp2</i>  | SFRP2_L     | CAGGACAACGACCTCTGCAT  |
|               | SFRP2_R     | TCACACACCTTGGGAGCTTC  |
| <i>Tcf7l2</i> | TCF7L2_L    | TCGTACACCCGACAGTCAAG  |
|               | TCF7L2_R    | GGGCTTCTTTATGTGGGGCT  |
| <i>Wif1</i>   | WIF1_L      | AGAAAGCCCTGTGCATACCC  |
|               | WIF1_R      | CAGGTGGTTGAGCAGTTTGC  |
| <i>Col1a1</i> | COL1A1_L    | CAGGCTGGTGTGATGGGATT  |
|               | COL1A1_R    | CTCCATCTTTGCCAGCAGGA  |
| <i>Flt4</i>   | FLT4_L      | AGAATGACCTGGGCCCTAT   |
|               | FLT4_R      | TCCTTTGAGCCACTCGACAC  |
| <i>Myl7</i>   | MYL7_L      | AGCTCGGGAGGGTAAGTGTT  |
|               | MYL7_R      | GTCCGTCCCATTGAGCTTCT  |
| <i>Pdgfb</i>  | PDGFB_L     | AGCCCATCTTCAAGAAGGCC  |
|               | PDGFB_R     | AATGGTCACCCGAGCTTGAG  |
| <i>Spp1</i>   | SPP1_L      | AATCTCCTTGCGCCACAGAA  |
|               | SPP1_R      | CATCGTTCATGTGGTCA     |
| <i>Vegfb</i>  | VEGFB_L2    | GCCAATGTGAATGCAGACCA  |
|               | VEGFB_R2    | TGATGTCAGCTGGGGAGGAT  |
| <i>Efnb2</i>  | EFNB2_L     | TCCAACAAGACGTCCAGAGC  |
|               | EFNB2_R     | CTGTTGCCATCGGTGCTAGA  |
| <i>Pak6</i>   | PAK6_L      | ACTACCAGCACCTCAACGTG  |
|               | PAK6_R      | ACAGTGGCAATCTGCTCCTC  |
| <i>Sema4d</i> | SEMA4D_L    | TAGTGTTGAGAACCGCGGTG  |
|               | SEMA4D_R    | GGCTTGTGAAACTGCACCAG  |
